# Supplementary material
Source: PubMed Central journal article supplement (PMC4113341)

## 1 Supplemental Methods

2

3 *Detection of surface EMR1 by flow cytometry.* EMR1 expression in bone marrow aspirates  
4 and peripheral blood was assessed by multiparameter flow cytometry using directly-  
5 conjugated antibodies against CD45 (clone 2D1), CD34 (clone 8G12), IL-5R $\alpha$  (CDw125;  
6 clone A14), CD16 (clone 3G8), CD9 (M-L13), CD14 (M5E2), CD49d (clone 9F10),  
7 CD117 (clone 104D2), CD19 (SJ25C1), CD15 (HI98), CD3 (SK7), CD69 (FN50) (BD  
8 Biosciences), CD203 (97A6) (Beckman Coulter, Indianapolis, In), CD10 (MEM78) and  
9 CD64 (10.1) (Invitrogen), Siglec-8 (7C9) (Biolegend) and anti-EMR1 (clone 1E7;  
10 Kalobios). After antibody staining, red blood cells were lysed and samples fixed as  
11 previously described (Maric et al. 2007 JACI). Eosinophils were identified in whole blood  
12 as CD45-positive, CD16-negative, CD9-positive cells with characteristic high side-scatter  
13 properties after doublet exclusion. Irrelevant, directly conjugated mouse IgG1 was used to  
14 ascertain background staining, and antibodies were titrated before use. Whole blood and  
15 bone marrow aspirates were analyzed on a FACSCanto II flow cytometer (BD  
16 Biosciences) using FCS Express 4 software (De Novo Software, Los Angeles, CA) for data  
17 analysis. Cell lines and purified cells were analyzed on an LSR II flow cytometer using  
18 Diva software (BD Biosciences). FlowJo software (Version 9.5.2, Tree Star, Ashland, Ore)  
19 was used for data analysis.

20

21 *Primers used for real-time quantitative PCR.* EMR1 and Siglec-8 mRNA were amplified  
22 using previously published primer sets<sup>1,2</sup> and 1X SYBR Green (SA Biosciences,  
23 Frederick, MD) in a final 20  $\mu$ L reaction volume. Forward and reverse primer sequences  
24 for the 18S control were 3'-GCCCGAAGCGTTTACTTTGA-5' and 3'-

25 TCCATTATTCCTAGCTGCGGTATC-5', respectively. The cationic proteins, MBP,  
26 EPX, ECP, EDN, and IL5RA (membrane form) were amplified using the following  
27 commercially available TaqMan primers (Applied Biosystems) in a final volume of 10  $\mu$ l  
28 according to the manufacturer's instructions: MBP, PRG2, Hs00794928\_m1; EPX,  
29 Hs00946094\_m1; ECP, RNAse2, Hs00795553\_s1; EDN, RNAse3, Hs00795553\_s1; IL-  
30 5RA, s00602482\_m1; 18S, X03205.1.

31

32 *Immunostaining.* Immunohistochemical staining for eosinophil peroxidase (EPX) was  
33 performed on formalin-fixed paraffin sections of a skin biopsy using a mouse anti-mouse  
34 monoclonal antibody (1:500, provided by Dr. J.J. Lee) as previously described (Klion et al.  
35 Blood 2013). Slides were deparaffinized and heat-induced epitope retrieval was  
36 accomplished with Leica retrieval solution (Citric buffer) for 25 min. Immunostaining for  
37 EMR1 was performed on an adjacent frozen sample of the same biopsy using mouse 1E7  
38 antibody at 10  $\mu$ g/ml. Slides were prepared by Histoserv Inc. (Germantown, MD). Anti-  
39 EPX and anti-EMR1 antibodies were detected using the BondMax biotin-avidin free  
40 polymer-based detection system with Diaminobenzine as the chromogen. Samples were  
41 analyzed on a Leica BondMax autostainer (Leica Microsystems, Bannockburn, IL).

42

43 Immunofluorescence staining for EMR1, EPX and CD68 was performed on acetone-fixed  
44 nasal polyp frozen sections. Slides were washed twice with PBST (PBS with 0.1% Tween  
45 20) prior to incubation with 700  $\mu$ l of Blocking Solution (2% BSA, 1.5% goat serum  
46 (Abcam)), 1.5% donkey serum (Abcam) in PBS) at room temperature for 1 hour. After  
47 three washes with PBS, slides were incubated overnight at 4°C with mouse 1E7-Alexa595

48 (10 µg/ml), or mouse anti-EPX antibody (Abcam; diluted 1:200 with 2% BSA with PBS),  
49 and/or mouse anti-CD68 (Ventana; clone KP-1, diluted 1:2). The slides treated with anti-  
50 EMR1, anti-EPX- and anti-CD68 were then washed and incubated with goat anti-mouse  
51 IgG-DyLight488 (Jackson) at 3 µg/mL in 2% BSA with PBS at room temperature for 1  
52 hour. After three washes with PBST, 2-3 drops of mounting medium (VECTASHIELD  
53 Mounting Medium) were added prior to coverslipping. Images were taken on a Nikon  
54 fluorescent microscope.

55

56 *c1E7 ELISA*. Plasma samples were analyzed for c1E7 using an antigen-based ELISA.  
57 Briefly, a microplate was coated with 100 ng/well of EMR1-Fc (Kalobios) in coating  
58 buffer (20 mM Tris; 150 mM NaCl, pH 8.0). After incubation for 1h at 37°C with shaking,  
59 the plate was washed three times with wash buffer (PBS with 0.01% Tween 20; PBST) and  
60 blocked for 20 minutes at 37°C with Superblock (Pierce). Diluted cynomolgus monkey  
61 plasma samples (1/300 and/or 1/600 for group 1 and 1/1500 and/or 1/3000 for group 2) and  
62 recombinant standards were incubated for 1h at room temperature. The plate was washed  
63 three times with wash buffer prior to addition of peroxidase-conjugated AffiniPure goat  
64 anti-human IgG Fab-specific antibody (JacksonImmunoResearch; 10 ng/ml in PBST with  
65 1% BSA). After a final wash step, TMB substrate solution was added (Invitrogen) and the  
66 reaction was allowed to proceed for 7 minutes before the addition of stop solution (1N  
67 H<sub>2</sub>SO<sub>4</sub>). Absorbance was read at 450 nm using a Thermomax Molecular Device microplate  
68 reader. Data was plotted and fitted using a 4-paramter logistic regression using SoftMax  
69 Pro 4.0 software (Molecular Devices). The concentration in plasma samples was  
70 determined based on the values from the standard curve.

71

72 *Measurement of eosinophil granule proteins.* Levels of eosinophil granule proteins (major  
73 basic protein (MBP), eosinophil cationic protein (ECP), eosinophil derived neurotoxin  
74 (EDN) and eosinophil peroxidase (EPO)) were measured in supernatants and primate  
75 plasma using a customized suspension array assay in multiplex (Makiya et al., J.  
76 Immunological Methods, submitted). Coupling of antibodies to the microspheres and  
77 assay conditions were performed according to the manufacturer's instructions (Luminex  
78 Corporation, Austin, TX). Briefly, supernatants and plasma were reduced and alkylated to  
79 remove MBP from complexes<sup>3</sup> before incubation at a final dilution of 1:8.8 (supernatants)  
80 or 1:44 (plasma) with magnetic microspheres coupled to mouse anti-MBP, ECP, EDN and  
81 EPO monoclonal antibodies<sup>4</sup>. The microspheres were subsequently incubated with rabbit  
82 anti-MBP, ECP, EDN and EPO<sup>4</sup>, biotinylated goat anti-rabbit IgG and PE-streptavidin  
83 (Jackson ImmunoResearch Laboratories, West Grove, PA) and analyzed using a Bio-Plex  
84 200 (Bio-Rad Laboratories, Hercules, CA) instrument. All assays were performed in  
85 duplicate and concentrations were calculated based on a standard curve using SoftMax Pro  
86 Software (Molecular Devices, Sunnyvale, CA).

87

### 88 **Legend of Supplementary Figures**

89

90 **Figure E1:** *In vitro* differentiation of CD34+ cells. **A.** Representative dot plots of  
91 EMR1/Siglec-8 and EMR1/IL-5R $\alpha$  surface expression at Day 4, **B.** Overlay of EMR1  
92 staining at Day 4 and Day 24, **C.** Representative dot plots of Siglec-8 and IL-5R $\alpha$  surface  
93 expression on EMR1+ cells at Day 24.

94

95 **Figure E2.** *In vitro* modulation of EMR1 in response to IL-5 stimulation. **A, B.** Surface  
96 expression of EMR1 and CD69 on purified eosinophils after 2hr stimulation (n=14, 6 ND  
97 and 8 HES), **C.** EMR1 mRNA up-regulation by IL-5 after 6hr stimulation (n=13, 4 ND and 9  
98 HES). CM=culture medium. \*  $P < .05$ , \*\*  $P < .01$  and \*\*\*  $P < .001$ .

99

100 **Figure E3.** Cytofluorimetric gating for the determination of eosinophil cell death  
101 induced by NK cells in the presence of afucosylated anti-EMR1 antibody (c1E7). Results  
102 shown are from one representative experiment. NK killing assays were performed with  
103 purified eosinophils at an E:T ratio of 5:1. The cells were incubated together for 4 hours  
104 and washed prior to the addition of Annexin-V-FITC. After exclusion of cell debris and  
105 doublets, the percentage of Annexin V+ cells were determined in the eosinophil (Eo) and  
106 effector NK (NK) cell gates.

107

108 **Figure E4.** Levels of eosinophil granule proteins (ECP, MBP, EPO and EDN) in plasma  
109 samples from the 4 monkeys at all time points.

110

### 111 **Supplemental References.**

112

- 113 1. Hamann J, Koning N, Pouwels W, Ulfman LH, van Eijk M, Stacey M, et al.  
114 EMR1, the human homolog of F4/80, is an eosinophil-specific receptor. *Eur J*  
115 *Immunol* 2007; 37:2797-802.
- 116 2. Hudson SA, Herrmann H, Du J, Cox P, Haddad el B, Butler B, et al.  
117 Developmental, malignancy-related, and cross-species analysis of eosinophil,  
118 mast cell, and basophil siglec-8 expression. *J Clin Immunol* 2011; 31:1045-53.

- 119 3. Furuta GT, Kagalwalla AF, Lee JJ, Alumkai P, Maybruck BT, Fillon S, et al. The  
120 oesophageal string test: a novel, minimally invasive method measures mucosal  
121 inflammation in eosinophilic oesophagitis. *Gut* 2013;62:1395-405
- 122 4. Gopinath R, Hanna LE, Kumaraswami V, Perumal V, Kavitha V, Vijayasekaran  
123 V, et al. Perturbations in eosinophil homeostasis following treatment for  
124 lymphatic filariasis. *Infect Immun* 2000;68:93-9.
- 125  
126  
127

**Table E1.** Pharmacokinetic parameters following administration of chimeric afucosylated anti-EMR1 antibody (c1E7) to non-human primates.

|                                                   | Dose 1mg/kg      |                | Dose 5 mg/kg   |                |
|---------------------------------------------------|------------------|----------------|----------------|----------------|
|                                                   | CYNO<br>129-225c | CYNO<br>444-93 | CYNO<br>10-65c | CYNO<br>10-66c |
| $C_{max}$ ( $\mu\text{g/mL}$ )                    | 33.3             | 48.8           | 130.5          | 162.8          |
| $AUC_{\infty}$ ( $\mu\text{g}\cdot\text{hr/mL}$ ) | 3226             | 2885           | 22132          | 27545          |
| CL ( $\text{mL/kg/hr}$ )                          | 310              | 347            | 226            | 182            |
| $V_{ss}$ ( $\text{mL/kg}$ )                       | 42.7             | 37.0           | 68.7           | 58.4           |
| $T_{1/2}$ (hr)                                    | 92.2             | 77.5           | 205            | 215            |

$C_{max}$ , maximum concentration;  $T_{max}$ , time of peak concentration;  $AUC_{\infty}$ , Area under the curve from time 0 extrapolated to infinite time; CL, systemic clearance;  $V_{ss}$ , volume of distribution at steady state;  $T_{1/2}$ , elimination half life.

**Table E2. Eosinophil counts measured at each time point in the 4 monkeys before and after receiving a single dose of afucosylated anti-EMR1 antibody**

|                         | Cynomologus         | Timepoint      | Eosinophils % (*) | White blood count ( $10^9/L$ ) | Eosinophils Abs ( $/mm^3$ ) |
|-------------------------|---------------------|----------------|-------------------|--------------------------------|-----------------------------|
| <b>Group 1<br/>1MPK</b> | <b>CYN 444-93</b>   | <b>Predose</b> | 5.45              | 7.93                           | 431.9                       |
|                         |                     | <b>5min</b>    | NA                | NA                             | NA                          |
|                         |                     | <b>2HR</b>     | NA                | NA                             | NA                          |
|                         |                     | <b>4HR</b>     | NA                | NA                             | NA                          |
|                         |                     | <b>8HR</b>     | 0.56              | NA                             | NA                          |
|                         |                     | <b>Day 2</b>   | 0.27              | NA                             | NA                          |
|                         |                     | <b>Day 4</b>   | 0.30              | NA                             | NA                          |
|                         |                     | <b>Day 8</b>   | 0.42              | NA                             | NA                          |
|                         |                     | <b>Day 15</b>  | 1.00              | NA                             | NA                          |
|                         |                     | <b>Day 22</b>  | 3.98              | NA                             | NA                          |
|                         |                     | <b>Day 28</b>  | 9.60              | NA                             | NA                          |
|                         |                     | <b>Day 42</b>  | 11.23             | NA                             | NA                          |
|                         | <b>Day 56</b>       | NA             | NA                | NA                             |                             |
|                         | <b>CYN 129-225c</b> | <b>Predose</b> | 7.18              | 13.80                          | 990.3                       |
|                         |                     | <b>5min</b>    | NA                | NA                             | NA                          |
|                         |                     | <b>2HR</b>     | NA                | NA                             | NA                          |
|                         |                     | <b>4HR</b>     | NA                | NA                             | NA                          |
|                         |                     | <b>8HR</b>     | 0.00              | NA                             | NA                          |
|                         |                     | <b>Day 2</b>   | 0.00              | NA                             | NA                          |
|                         |                     | <b>Day 4</b>   | 0.00              | NA                             | NA                          |
|                         |                     | <b>Day 8</b>   | 0.42              | NA                             | NA                          |
|                         |                     | <b>Day 15</b>  | 0.55              | NA                             | NA                          |
| <b>Day 22</b>           |                     | 2.95           | NA                | NA                             |                             |
| <b>Day 28</b>           |                     | 8.96           | NA                | NA                             |                             |
| <b>Day 42</b>           |                     | 9.43           | NA                | NA                             |                             |
| <b>Day 56</b>           | NA                  | NA             | NA                |                                |                             |
| <b>Group 2<br/>5MPK</b> | <b>CYN 10-65c</b>   | <b>Predose</b> | 3.32              | 12.66                          | 420.1                       |
|                         |                     | <b>Predose</b> | 5.45              | 7.90                           | 430.6                       |
|                         |                     | <b>5min</b>    | 3.71              | NA                             | NA                          |
|                         |                     | <b>2HR</b>     | 0.29              | NA                             | NA                          |
|                         |                     | <b>4HR</b>     | 0.54              | NA                             | NA                          |
|                         |                     | <b>8HR</b>     | 0.00              | NA                             | NA                          |
|                         |                     | <b>Day 2</b>   | 0.00              | NA                             | NA                          |
|                         |                     | <b>Day 4</b>   | 0.32              | NA                             | NA                          |
|                         |                     | <b>Day 8</b>   | 0.00              | 13.11                          | 0.0                         |
|                         |                     | <b>Day 15</b>  | 0.92              | NA                             | NA                          |
|                         |                     | <b>Day 22</b>  | 0.60              | NA                             | NA                          |
|                         |                     | <b>Day 28</b>  | 0.74              | 12.07                          | 88.8                        |
|                         | <b>Day 42</b>       | 7.55           | 11.81             | 891.3                          |                             |
|                         | <b>Day 56</b>       | 4.72           | 13.16             | 621.3                          |                             |
|                         | <b>CYN 10-66c</b>   | <b>Predose</b> | 6.21              | 10.82                          | 672.4                       |
|                         |                     | <b>Predose</b> | 3.95              | 8.45                           | 333.8                       |
| <b>5min</b>             |                     | 4.10           | NA                | NA                             |                             |



|  |               |      |      |       |
|--|---------------|------|------|-------|
|  | <b>2HR</b>    | 0.00 | NA   | NA    |
|  | <b>4HR</b>    | 0.00 | NA   | NA    |
|  | <b>8HR</b>    | 0.31 | NA   | NA    |
|  | <b>Day 2</b>  | 0.00 | NA   | NA    |
|  | <b>Day 4</b>  | 0.00 | NA   | NA    |
|  | <b>Day 8</b>  | 0.48 | 7.07 | 33.7  |
|  | <b>Day 15</b> | 0.96 | NA   | NA    |
|  | <b>Day 22</b> | 1.26 | NA   | NA    |
|  | <b>Day 28</b> | 0.47 | 7.17 | 33.8  |
|  | <b>Day 42</b> | 0.88 | 9.65 | 84.6  |
|  | <b>Day 56</b> | 2.53 | 9.09 | 229.9 |

NA: Not available

(\*): % based on cytopsin counting on 200-500 cells per slides

**Table E3.** Laboratory parameters before and after administration of a single 5 mg/kg intravenous dose of chimeric afucosylated anti-EMR1 antibody to two cynomolgus monkeys.

| Laboratory Parameter       | Normal value      | Unit                     | PREDOSE     |             | Day 8       |             | Day 28      |             | Day 29      |             | Day 42      |             | Day 56      |             |
|----------------------------|-------------------|--------------------------|-------------|-------------|-------------|-------------|-------------|-------------|-------------|-------------|-------------|-------------|-------------|-------------|
|                            |                   |                          | CYNO 10-65c | CYNO 10-66c |
| <b>Hematology</b>          |                   |                          |             |             |             |             |             |             |             |             |             |             |             |             |
| White blood cell count     | <b>5.7-21</b>     | <b>10<sup>9</sup>/L</b>  | 7.9         | 10.82       | 13.11       | 7.07        | 12.07       | 7.17        | nd          | nd          | 11.81       | 9.65        | 13.16       | 9.09        |
| Absolute lymphocyte count  | <b>4.3-10</b>     | <b>10<sup>9</sup>/L</b>  | 4.65        | 5.69        | 6.5         | 5.05        | 6.79        | 5.24        | nd          | nd          | 5.59        | 4.38        | 6.79        | 5.49        |
| Absolute monocyte count    | <b>0-1</b>        | <b>10<sup>9</sup>/L</b>  | 0.05        | 0.47        | 0.4         | 0.13        | 0.52        | 0.04        | nd          | nd          | 0.39        | 0.24        | 0.33        | 0.3         |
| Absolute neutrophil count  | <b>1.9-6.24</b>   | <b>10<sup>9</sup>/L</b>  | 3.21        | 4.66        | 6.21        | 1.9         | 4.76        | 1.9         | nd          | nd          | 5.84        | 5.04        | 6.04        | 3.3         |
| Red blood cell count       | <b>4.8-6.3</b>    | <b>10<sup>12</sup>/L</b> | 5.79        | 6.26        | 5.74        | 4.93        | 5.92        | 5.71        | nd          | nd          | 5.64        | 5.21        | 5.73        | 5.74        |
| Platelets                  | <b>130-934</b>    | <b>10<sup>9</sup>/L</b>  | 334         | 438         | 507         | 378         | 525         | 394         | nd          | nd          | 461         | 376         | 422         | 336         |
| Hemoglobin                 | <b>8-15</b>       | <b>g/dl</b>              | 13.2        | 12.6        | 11.8        | 12.6        | 12.6        | 12.5        | nd          | nd          | 12          | 12.3        | 12          | 13          |
| <b>Clinical Chemistry</b>  |                   |                          |             |             |             |             |             |             |             |             |             |             |             |             |
| Total Protein              | <b>5.9 - 7.6</b>  | <b>g/dl</b>              | 7.1         | 7.2         | 7.2         | 7           | 7.4         | 7           | 7           | 7           | 7.3         | 7.2         | 6.6         | 6.9         |
| Albumin                    | <b>2.8 - 4.4</b>  | <b>g/dl</b>              | 3.5         | 3.9         | 3.5         | 3.9         | 3.8         | 3.8         | 3.8         | 4           | 4.1         | 4.4         | 3.4         | 3.8         |
| Globulin                   | <b>2 - 3.9</b>    | <b>g/dl</b>              | 3.6         | 3.3         | 3.7         | 3.1         | 3.5         | 3.2         | 3.2         | 3           | 3.2         | 2.8         | 3.2         | 3.1         |
| Alkaline phosphatase       | <b>73- 210</b>    | <b>U/L</b>               | 353         | 298         | 347         | 345         | 292         | 273         | 305         | 258         | 361         | 286         | 411         | 386         |
| Alanine Aminotransferase   | <b>20 - 120</b>   | <b>U/L</b>               | 40          | 45          | 27          | 35          | vnr         | vnr         | 30          | 55          | 28          | 24          | 57          | 41          |
| Amylase                    | <b>149 - 500</b>  | <b>U/L</b>               | 156         | 232         | 146         | 231         | 171         | 255         | 178         | 273         | 184         | 284         | 149         | 273         |
| Aspartate Aminotransferase | <b>23 - 94</b>    | <b>U/L</b>               | 17          | 36          | 8           | 18          | vnr         | vnr         | 48          | 22          | 36          | 21          | 24          | 11          |
| Urea                       | <b>7 -25</b>      | <b>mg/dl</b>             | 16          | 13          | 16          | 14          | 19          | 15          | 21          | 18          | 16          | 12          | 19          | 14          |
| Calcium                    | <b>8.3 - 10.1</b> | <b>mg/dl</b>             | 9.1         | 10.2        | 9.6         | 9.6         | 9.9         | 10.4        | 10.2        | 10.5        | 10.2        | 10.1        | 9.7         | 10.2        |
| Cholesterol                | <b>73 - 179</b>   | <b>mg/dl</b>             | 173         | 175         | 182         | 199         | 186         | 180         | 185         | 186         | 165         | 185         | 162         | 178         |
| Creatinine                 | <b>0.4 - 1.2</b>  | <b>mg/dl</b>             | 0.8         | 0.7         | 0.7         | 0.7         | 0.8         | 0.6         | 0.8         | 0.6         | 0.7         | 0.7         | 0.7         | 0.6         |
| Glucose                    | <b>50 - 100</b>   | <b>mg/dl</b>             | 83          | 87          | 74          | 98          | 86          | 79          | 78          | 71          | 99          | 103         | 73          | 82          |
| Inorganic Phosphate        | <b>2.4 - 6.5</b>  | <b>mg/dl</b>             | 5.1         | 4.1         | 5.5         | 6.6         | 4.3         | 3.8         | 5           | 3.6         | 4.1         | 2.5         | 4.7         | 4.4         |
| Total Bilirubin            | <b>0.1 - 0.6</b>  | <b>mg/dl</b>             | 0.1         | 0.1         | 0.1         | 0.1         | 0.1         | 0.1         | 0.1         | 0.1         | 0.1         | 0.1         | 0.1         | 0.1         |

Values above or below the normal range are indicated by gray shading. vnr = value not returned due to sample or machine error, nd= not done

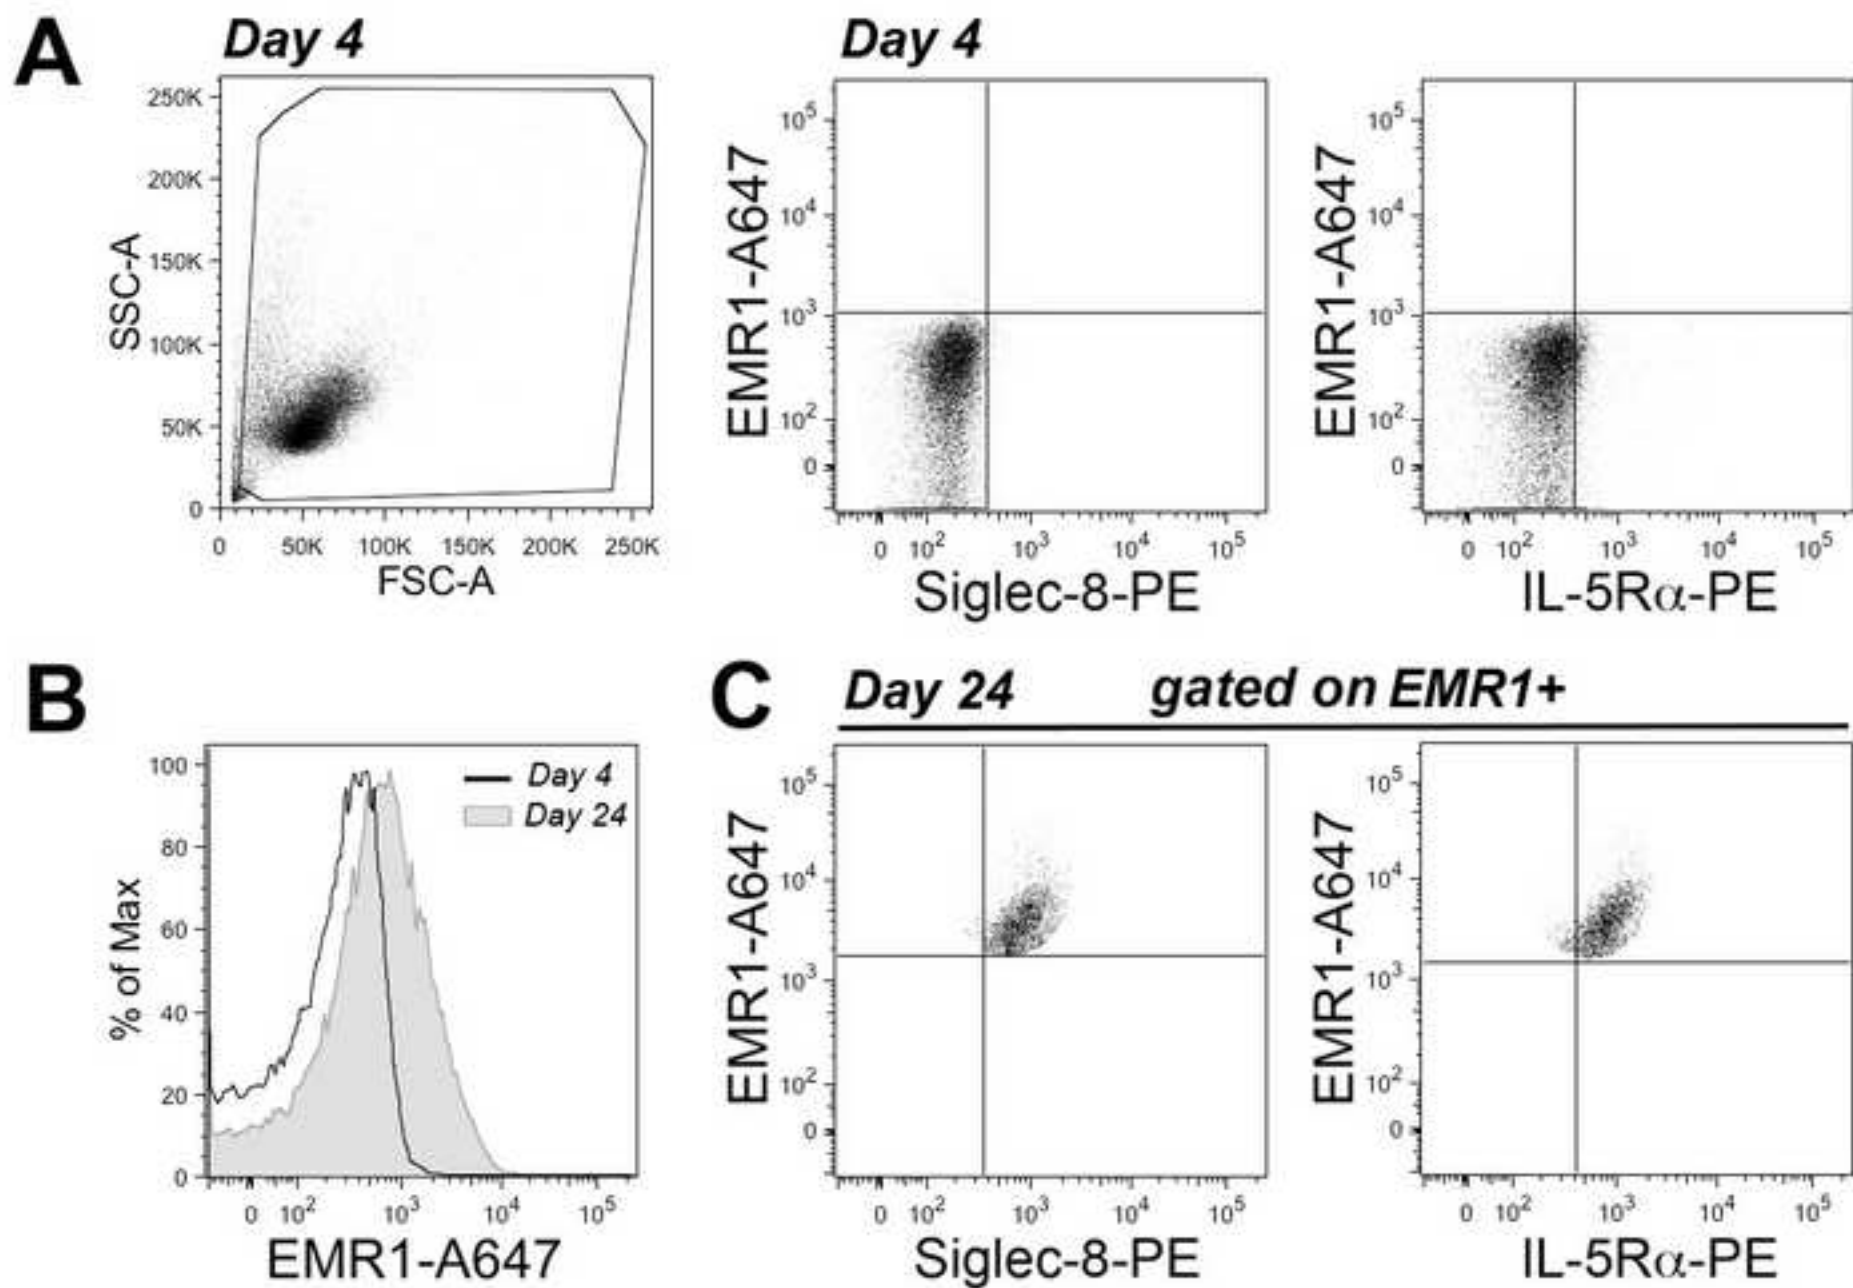

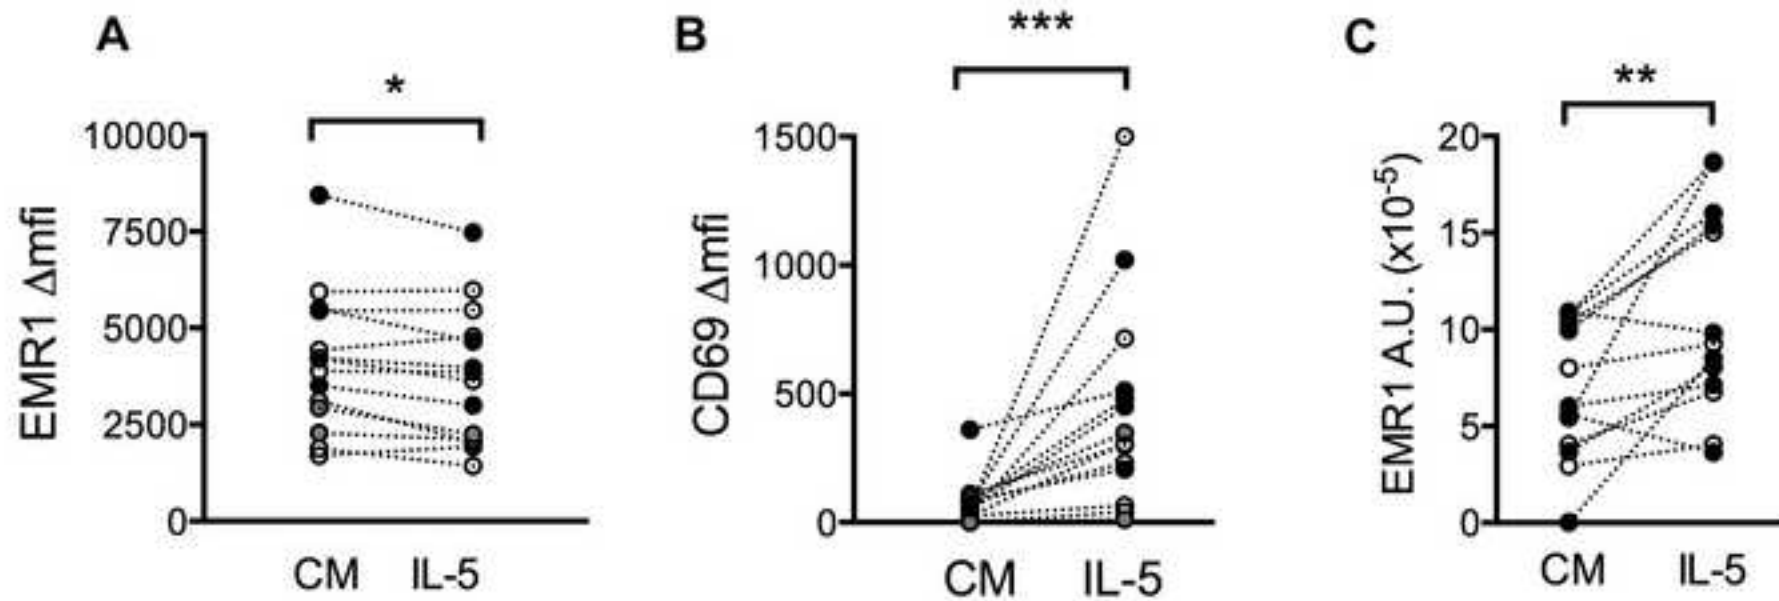

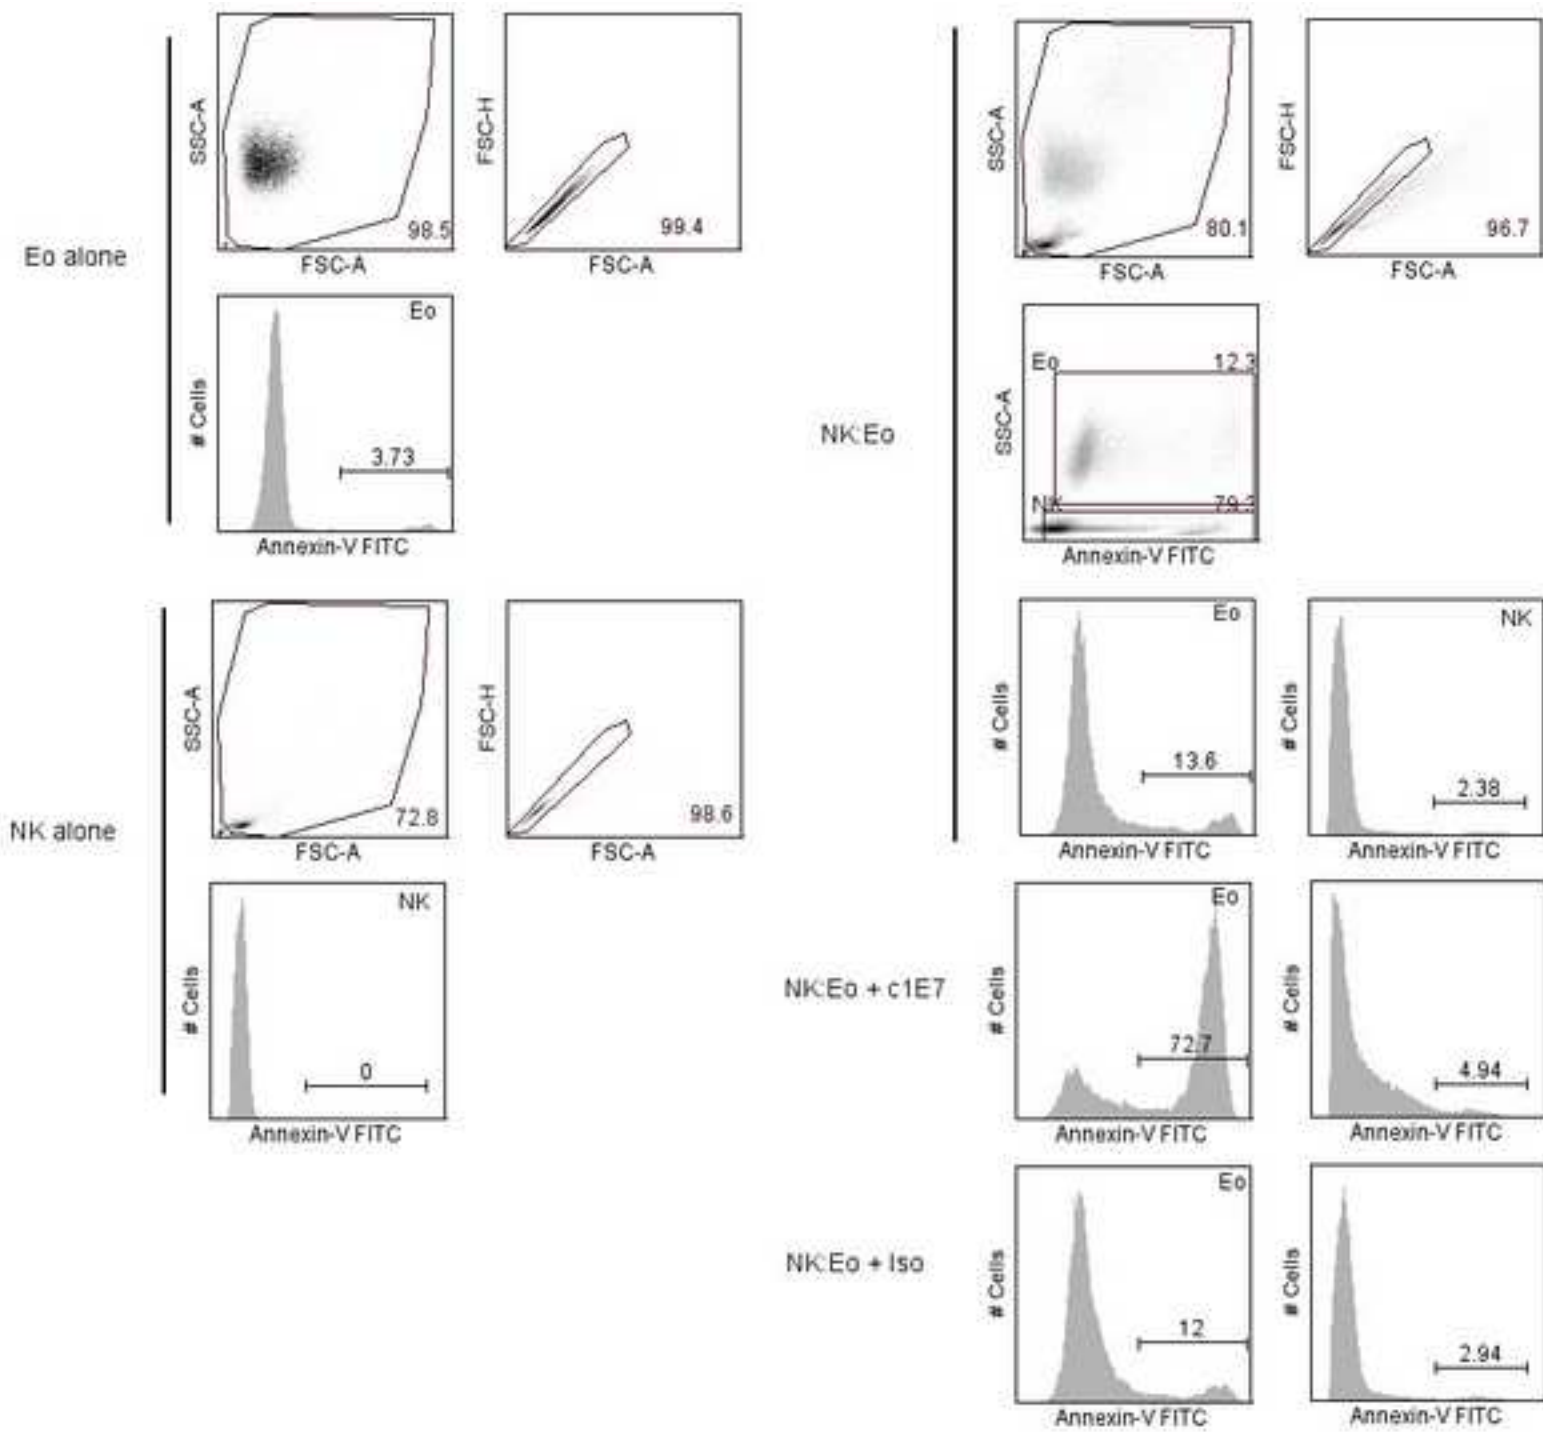

1mg/kg

5mg/kg

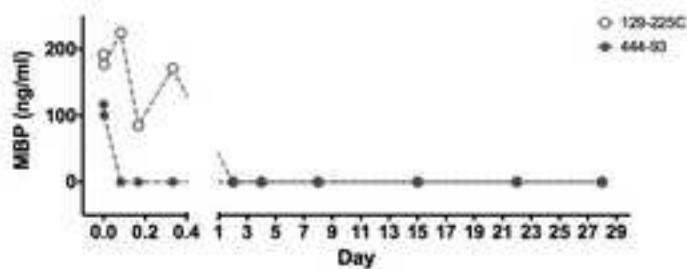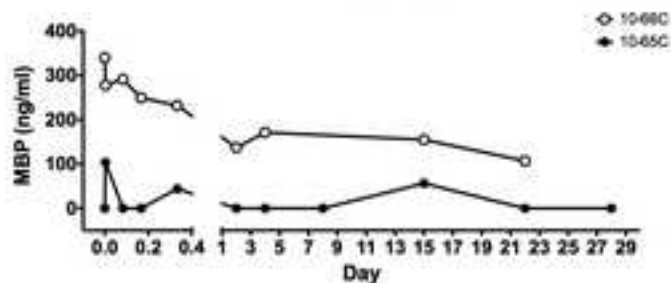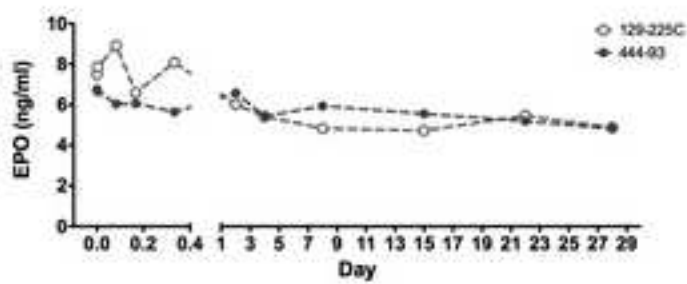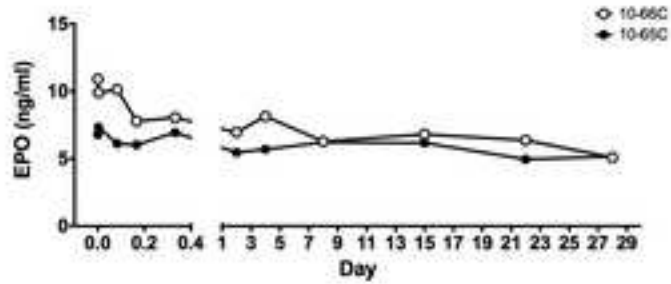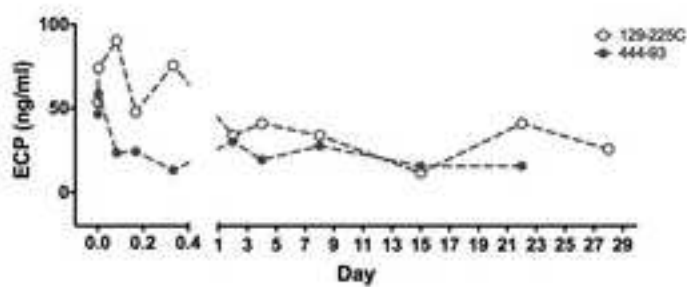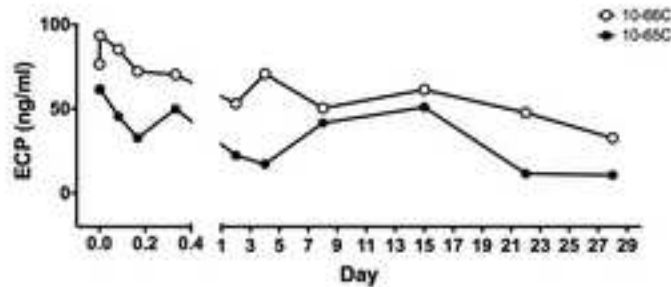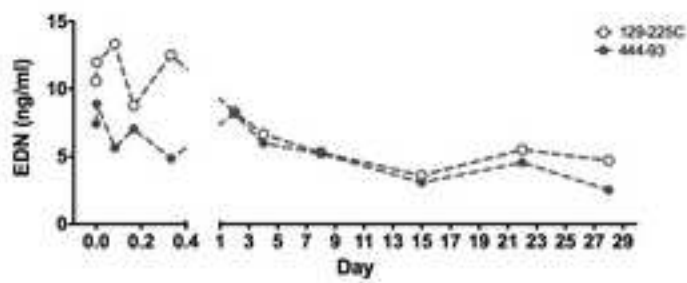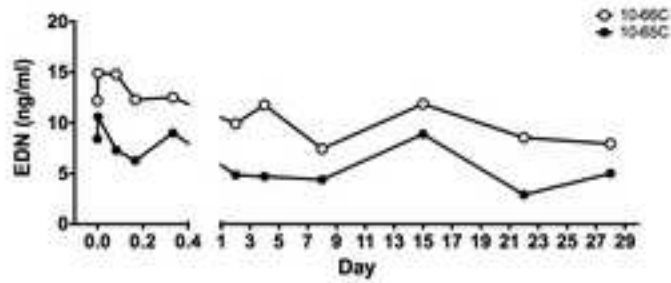

Supplement: NIHMS553109-supplement-supplement_1.pdf [file NIHMS553109-supplement-supplement_1.pdf]
